# Supplementary material for: SMAP is a pipeline for sample matching in proteogenomics
Source: PubMed Central journal article supplement (PMC8825821; doi:10.1038/s41467-022-28411-8), 2022-02-08
Supplement: 41467_2022_28411_MOESM3_ESM.pdf [file 41467_2022_28411_MOESM3_ESM.pdf]

### **Description of Additional Supplementary Files**

File Name: Supplementary Data 1

Description: Variant peptides and genotypes identified in the PsychENCODE BrainGVEX proteomics project

File Name: Supplementary Data 2

Description: Summary of the variant peptides
